# Supplementary material for: Registry for Acute Coronary Events in Nigeria (RACE‐Nigeria): Clinical Characterization, Management, and Outcome
Source: PubMed Central journal article supplement (PMC9075212; doi:10.1161/jaha.120.020244), 2021-12-22
Supplement: JAH3-11-e020244-s001.pdf [file JAH3-11-e020244-s001.pdf]

# **Supplemental Material**

**Table S1. Factors that increased the Odds of all-Cause Mortality on Univariate Analysis**

| <b>Variable</b>                        | <b>OR</b> | <b>95% CI</b> | <b>+P-Value</b> |
|----------------------------------------|-----------|---------------|-----------------|
| Socioeconomic status                   | 2.257     | 1.548-3.376   | <0.001          |
| Systolic blood pressure                | 1.022     | 0.972-0.987   | <0.001          |
| Diastolic blood pressure               | 1.019     | 0.970-0.992   | 0.001           |
| Heart rate                             | 1.028     | 1.019-1.037   | <0.001          |
| STEMI                                  | 1.916     | 0.362-0.754   | 0.001           |
| Troponin positive                      | 2.294     | 0.232-0.821   | 0.010           |
| Random blood sugar                     | 1.007     | 0.989-0.998   | 0.002           |
| Renal impairment                       | 3.003     | 0.213-0.159   | <0.001          |
| Left ventricular ejection fraction     | 1.060     | 0.927-0.959   | <0.001          |
| Left ventricular systolic dysfunction  | 1.233     | 1.096-1.388   | 0.001           |
| Left ventricular diastolic dysfunction | 1.632     | 1.242-2.144   | <0.001          |
| Cardiogenic shock                      | 6.098     | 0.105-0.256   | <0.001          |
| Mural Thrombus                         | 3.012     | 0.188-0.587   | <0.001          |
| Cardiac arrest                         | 27.739    | 0.022-0.098   | <0.001          |
| Pulmonary edema                        | 3.390     | 0.202-0.430   | <0.001          |
| Intervention (Thrombolysis/PCI/CABG)   | 4.425     | 0.167-0.423   | <0.001          |

+P value derived from univariate binary logistic regression.

ACS: Acute coronary syndrome, PCI: Percutaneous coronary intervention, CABG: Coronary artery bypass graft, OR: Odd ratio, CI: Confidence interval

Figure S1. Algorithm for Diagnosis of ACS.

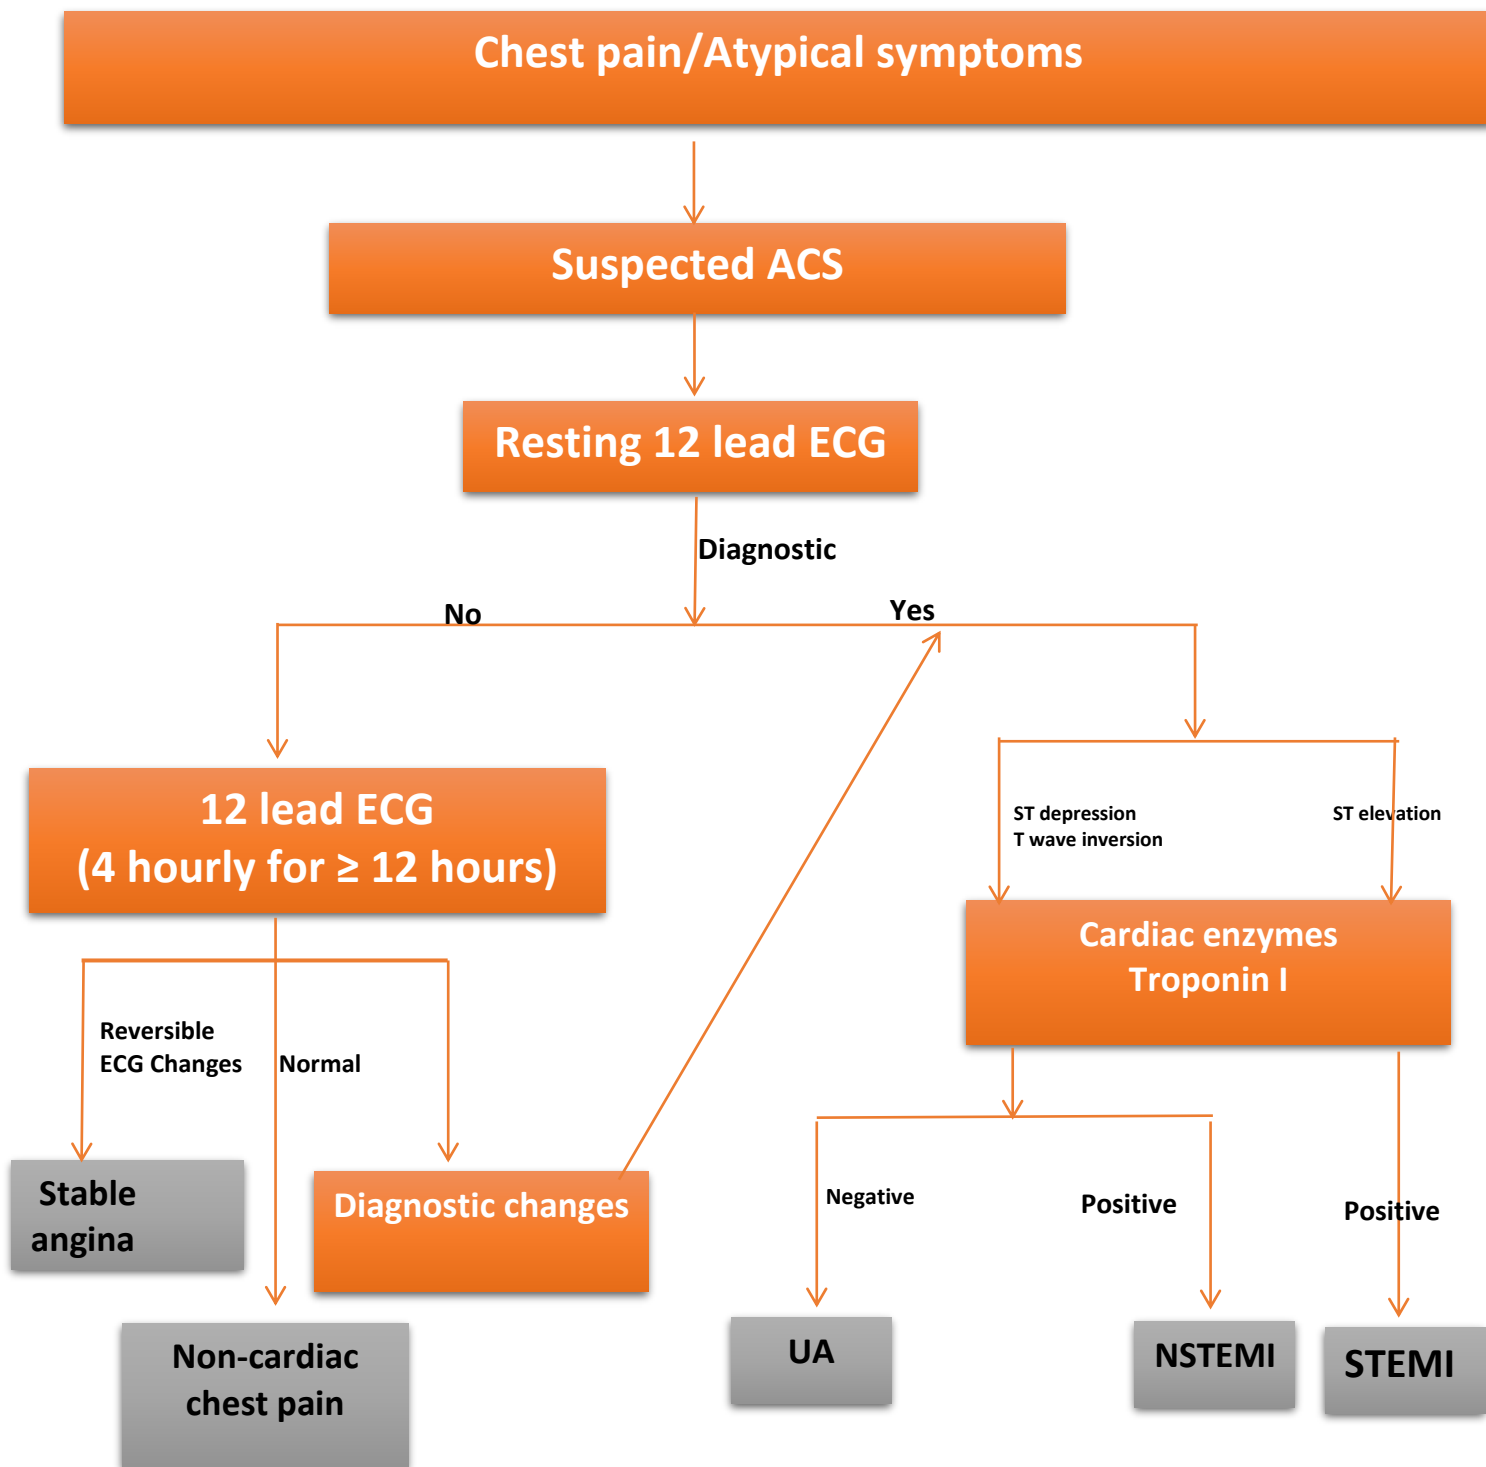

Diagnostic algorithm for Acute coronary syndrome.

ECG: Electrocardiography.

STEMI: ST segment elevation myocardial infarction.

NSTEMI: Non-ST segment elevation myocardial infarction.

UA: Unstable angina.
